# Supplementary material for: Genomic Instability in Cerebrospinal Fluid Cell-Free DNA Predicts Poor Prognosis in Solid Tumor Patients with Meningeal Metastasis
Source: MDPI journal article supplement (doi:10.3390/cancers14205028), 2022-10-14
Supplement: s1 [file s1]

# Supplementary Materials: Genomic Instability in Cerebrospinal Fluid Cell-Free DNA Predicts Poor Prognosis in Solid Tumor Patients with Meningeal Metastasis

Peng Wang, Qiaoling Zhang, Lei Han, Yanan Cheng, Zengfeng Sun, Qiang Yin, Zhen Zhang, Jinpu Yu

**Table S1.** Distribution of variation in the top 35 genes for different genomic status.

| Characteristic | GI, N = 37 <sup>1</sup> | GS, N = 19 <sup>1</sup> | p-Value <sup>2</sup> |
|----------------|-------------------------|-------------------------|----------------------|
| TP53           |                         |                         | <0.001               |
| variant        | 29 (78%)                | 6 (32%)                 |                      |
| wildtype       | 8 (22%)                 | 13 (68%)                |                      |
| CDKN2A         |                         |                         | 0.077                |
| variant        | 10 (27%)                | 1 (5.3%)                |                      |
| wildtype       | 27 (73%)                | 18 (95%)                |                      |
| APC            |                         |                         | 0.082                |
| variant        | 7 (19%)                 | 0 (0%)                  |                      |
| wildtype       | 30 (81%)                | 19 (100%)               |                      |
| RICTOR         |                         |                         | 0.11                 |
| variant        | 18 (49%)                | 5 (26%)                 |                      |
| wildtype       | 19 (51%)                | 14 (74%)                |                      |
| KMT2C          |                         |                         | 0.14                 |
| variant        | 9 (24%)                 | 1 (5.3%)                |                      |
| wildtype       | 28 (76%)                | 18 (95%)                |                      |
| ERBB2          |                         |                         | 0.15                 |
| variant        | 8 (22%)                 | 1 (5.3%)                |                      |
| wildtype       | 29 (78%)                | 18 (95%)                |                      |
| RB1            |                         |                         | 0.15                 |
| variant        | 8 (22%)                 | 1 (5.3%)                |                      |
| wildtype       | 29 (78%)                | 18 (95%)                |                      |
| EGFR           |                         |                         | 0.2                  |
| variant        | 28 (76%)                | 11 (58%)                |                      |
| wildtype       | 9 (24%)                 | 8 (42%)                 |                      |
| SMAD4          |                         |                         | 0.2                  |
| variant        | 5 (14%)                 | 0 (0%)                  |                      |
| wildtype       | 32 (86%)                | 19 (100%)               |                      |
| FGFR4          |                         |                         | 0.3                  |
| variant        | 4 (11%)                 | 0 (0%)                  |                      |
| wildtype       | 33 (89%)                | 19 (100%)               |                      |
| SETD2          |                         |                         | 0.3                  |
| variant        | 4 (11%)                 | 0 (0%)                  |                      |
| wildtype       | 33 (89%)                | 19 (100%)               |                      |
| STAG2          |                         |                         | 0.3                  |
| variant        | 2 (5.4%)                | 3 (16%)                 |                      |
| wildtype       | 35 (95%)                | 16 (84%)                |                      |
| STK11          |                         |                         | 0.3                  |
| variant        | 4 (11%)                 | 0 (0%)                  |                      |
| wildtype       | 33 (89%)                | 19 (100%)               |                      |

|          |          |          |      |
|----------|----------|----------|------|
| RBM10    |          |          | 0.4  |
| variant  | 6 (16%)  | 1 (5.3%) |      |
| wildtype | 31 (84%) | 18 (95%) |      |
| CDH1     |          |          | 0.4  |
| variant  | 3 (8.1%) | 3 (16%)  |      |
| wildtype | 34 (92%) | 16 (84%) |      |
| KMT2D    |          |          | 0.4  |
| variant  | 3 (8.1%) | 3 (16%)  |      |
| wildtype | 34 (92%) | 16 (84%) |      |
| MYC      |          |          | 0.4  |
| variant  | 6 (16%)  | 1 (5.3%) |      |
| wildtype | 31 (84%) | 18 (95%) |      |
| DNMT3A   |          |          | 0.6  |
| variant  | 2 (5.4%) | 2 (11%)  |      |
| wildtype | 35 (95%) | 17 (89%) |      |
| MTOR     |          |          | 0.6  |
| variant  | 2 (5.4%) | 2 (11%)  |      |
| wildtype | 35 (95%) | 17 (89%) |      |
| NF1      |          |          | 0.6  |
| variant  | 2 (5.4%) | 2 (11%)  |      |
| wildtype | 35 (95%) | 17 (89%) |      |
| TERT     |          |          | 0.6  |
| variant  | 2 (5.4%) | 2 (11%)  |      |
| wildtype | 35 (95%) | 17 (89%) |      |
| BRCA2    |          |          | 0.7  |
| variant  | 5 (14%)  | 1 (5.3%) |      |
| wildtype | 32 (86%) | 18 (95%) |      |
| CDK4     |          |          | 0.7  |
| variant  | 6 (16%)  | 2 (11%)  |      |
| wildtype | 31 (84%) | 17 (89%) |      |
| GNAS     |          |          | 0.7  |
| variant  | 4 (11%)  | 1 (5.3%) |      |
| wildtype | 33 (89%) | 18 (95%) |      |
| KRAS     |          |          | 0.7  |
| variant  | 5 (14%)  | 1 (5.3%) |      |
| wildtype | 32 (86%) | 18 (95%) |      |
| NOTCH1   |          |          | 0.7  |
| variant  | 4 (11%)  | 1 (5.3%) |      |
| wildtype | 33 (89%) | 18 (95%) |      |
| PTEN     |          |          | 0.7  |
| variant  | 7 (19%)  | 2 (11%)  |      |
| wildtype | 30 (81%) | 17 (89%) |      |
| PIK3CA   |          |          | 0.8  |
| variant  | 10 (27%) | 4 (21%)  |      |
| wildtype | 27 (73%) | 15 (79%) |      |
| BAP1     |          |          | >0.9 |
| variant  | 3 (8.1%) | 2 (11%)  |      |
| wildtype | 34 (92%) | 17 (89%) |      |
| BRCA1    |          |          | >0.9 |
| variant  | 3 (8.1%) | 1 (5.3%) |      |
| wildtype | 34 (92%) | 18 (95%) |      |
| CDK12    |          |          | >0.9 |
| variant  | 3 (8.1%) | 1 (5.3%) |      |
| wildtype | 34 (92%) | 18 (95%) |      |

|          |          |          |      |
|----------|----------|----------|------|
| FGFR1    |          |          | >0.9 |
| variant  | 3 (8.1%) | 2 (11%)  |      |
| wildtype | 34 (92%) | 17 (89%) |      |
| IRS2     |          |          | >0.9 |
| variant  | 3 (8.1%) | 1 (5.3%) |      |
| wildtype | 34 (92%) | 18 (95%) |      |
| MDM2     |          |          | >0.9 |
| variant  | 3 (8.1%) | 1 (5.3%) |      |
| wildtype | 34 (92%) | 18 (95%) |      |
| NOTCH2   |          |          | >0.9 |
| variant  | 3 (8.1%) | 1 (5.3%) |      |
| wildtype | 34 (92%) | 18 (95%) |      |

<sup>1</sup>n (%)

<sup>2</sup>Pearson's Chi-squared test; Fisher's exact test

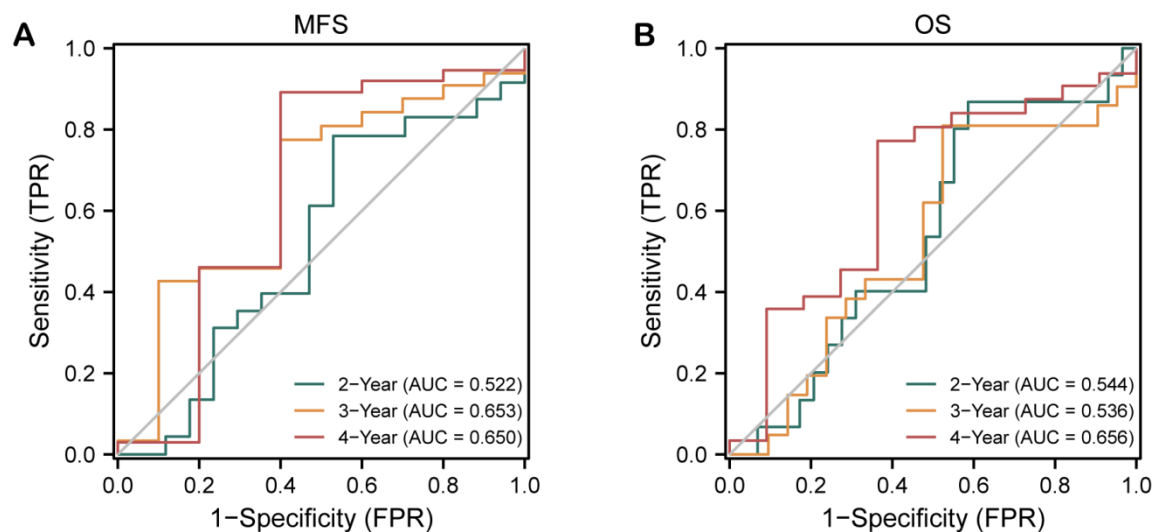

**Figure S1.** Receiver operating characteristic (ROC) curves for MFS and OS.

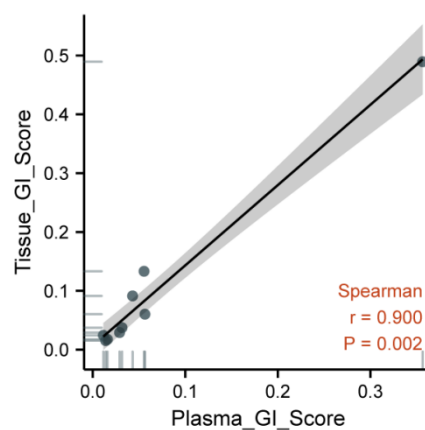

**Figure S2.** Correlation analysis of GI\_Scores between 9 paired plasma cfDNA and primary tumor tissues.
